# Supplementary figures and images for: Defining the Syrian hamster as a highly susceptible preclinical model for SARS-CoV-2 infection
Source: PubMed Central journal article supplement — bioRxiv. 2020 Sep 27:2020.09.25.314070. Preprint. [Version 1] doi: 10.1101/2020.09.25.314070 (PMC7523093; doi:10.1101/2020.09.25.314070), 2020-09-27

Supplemental Figure 1

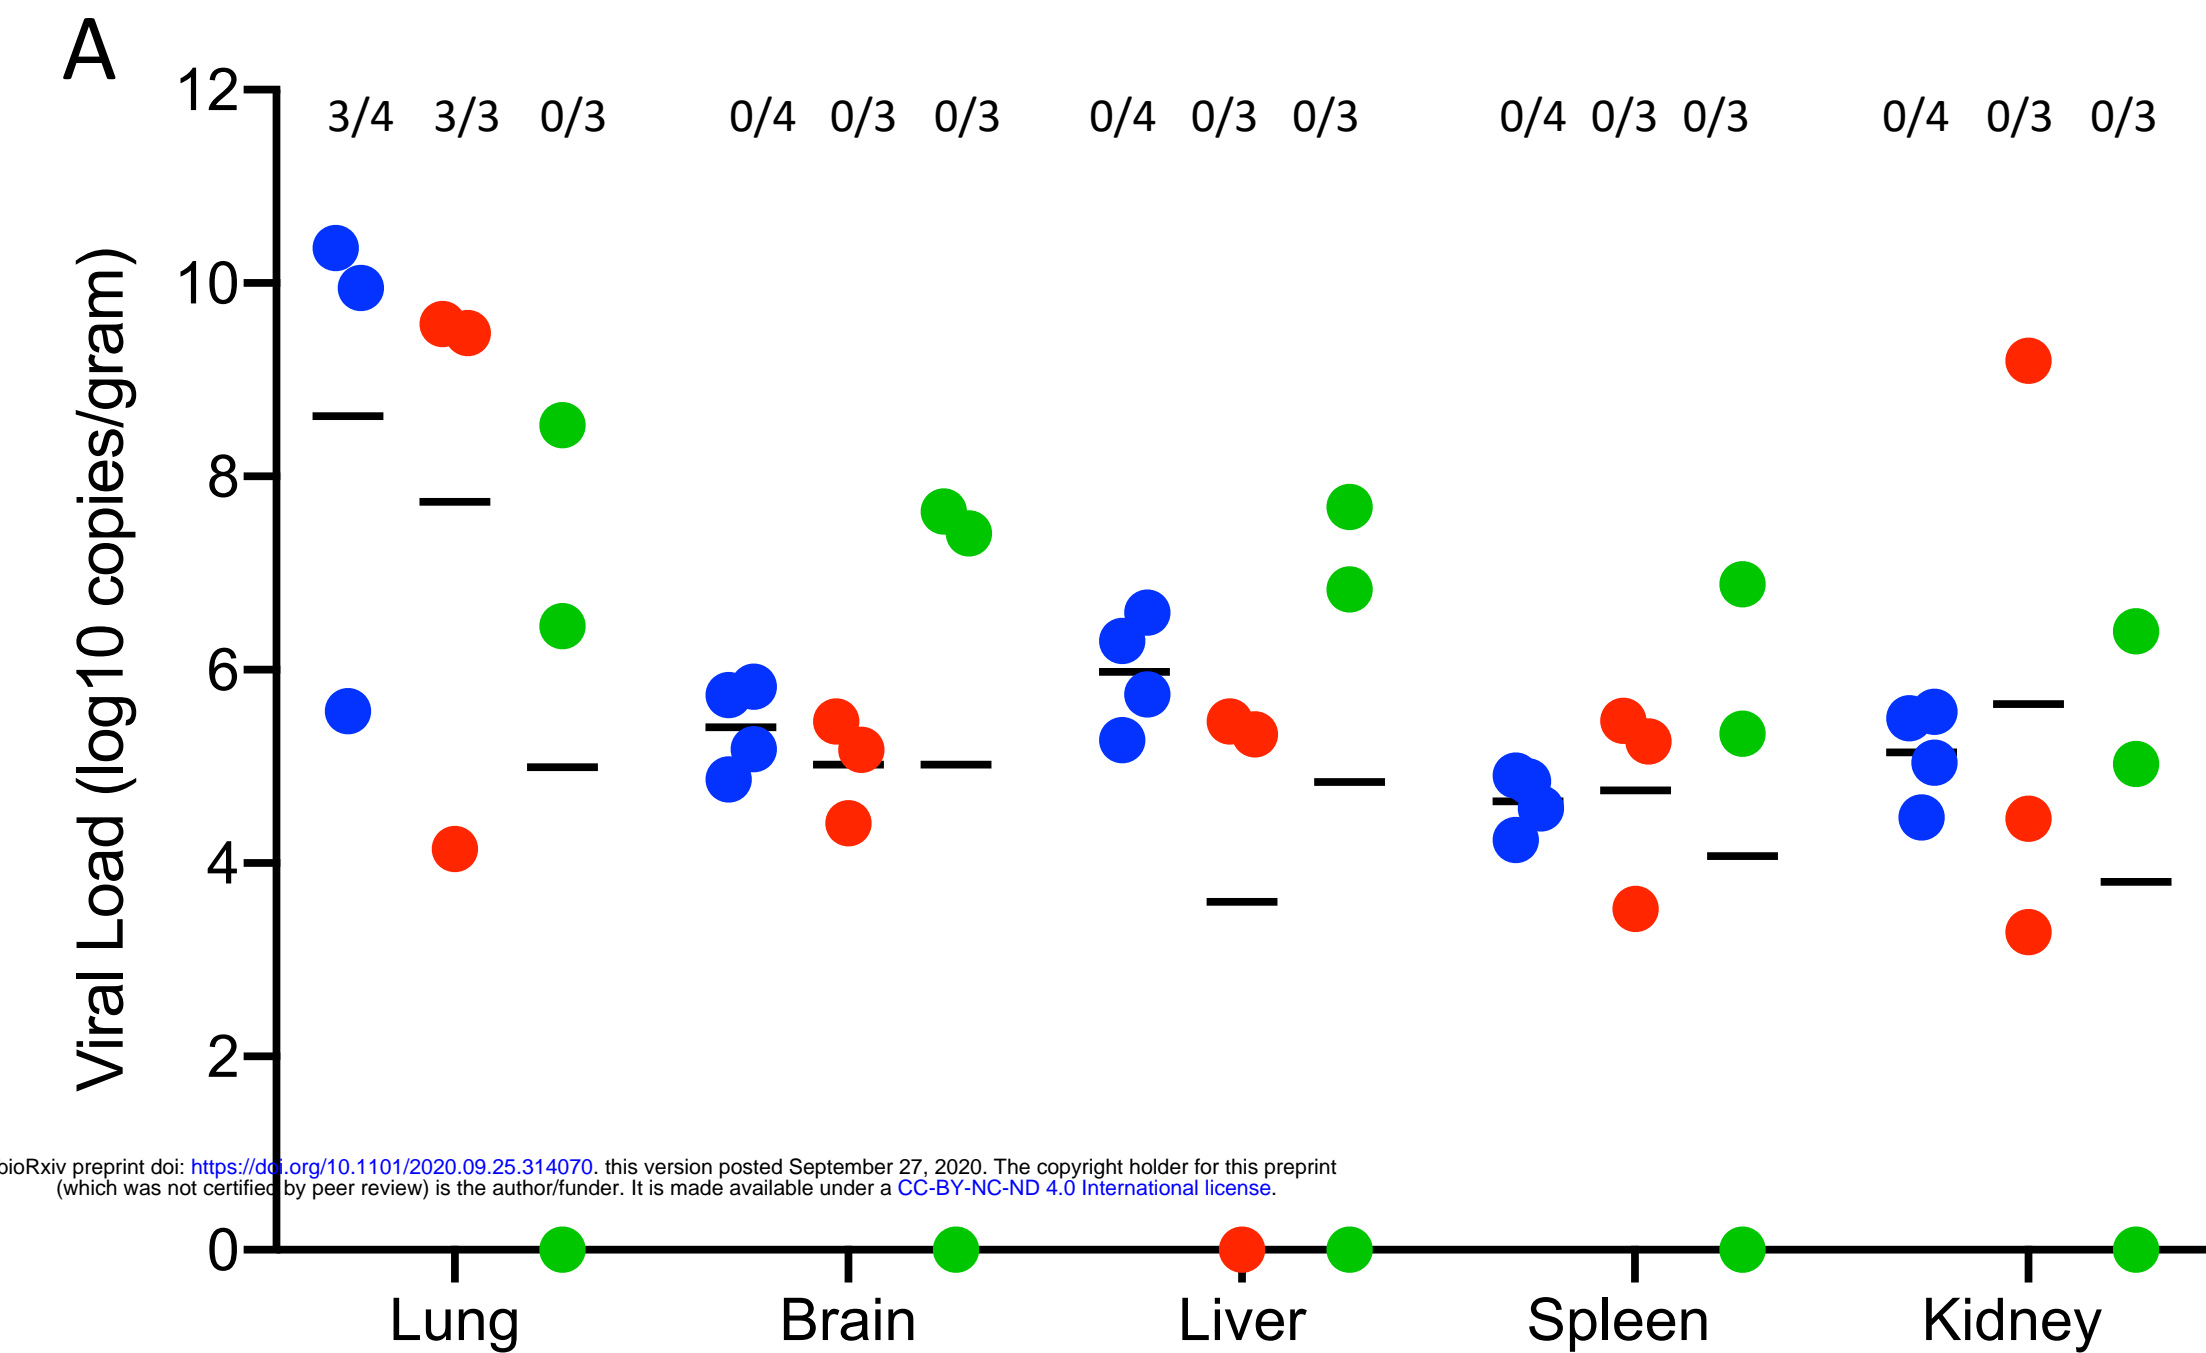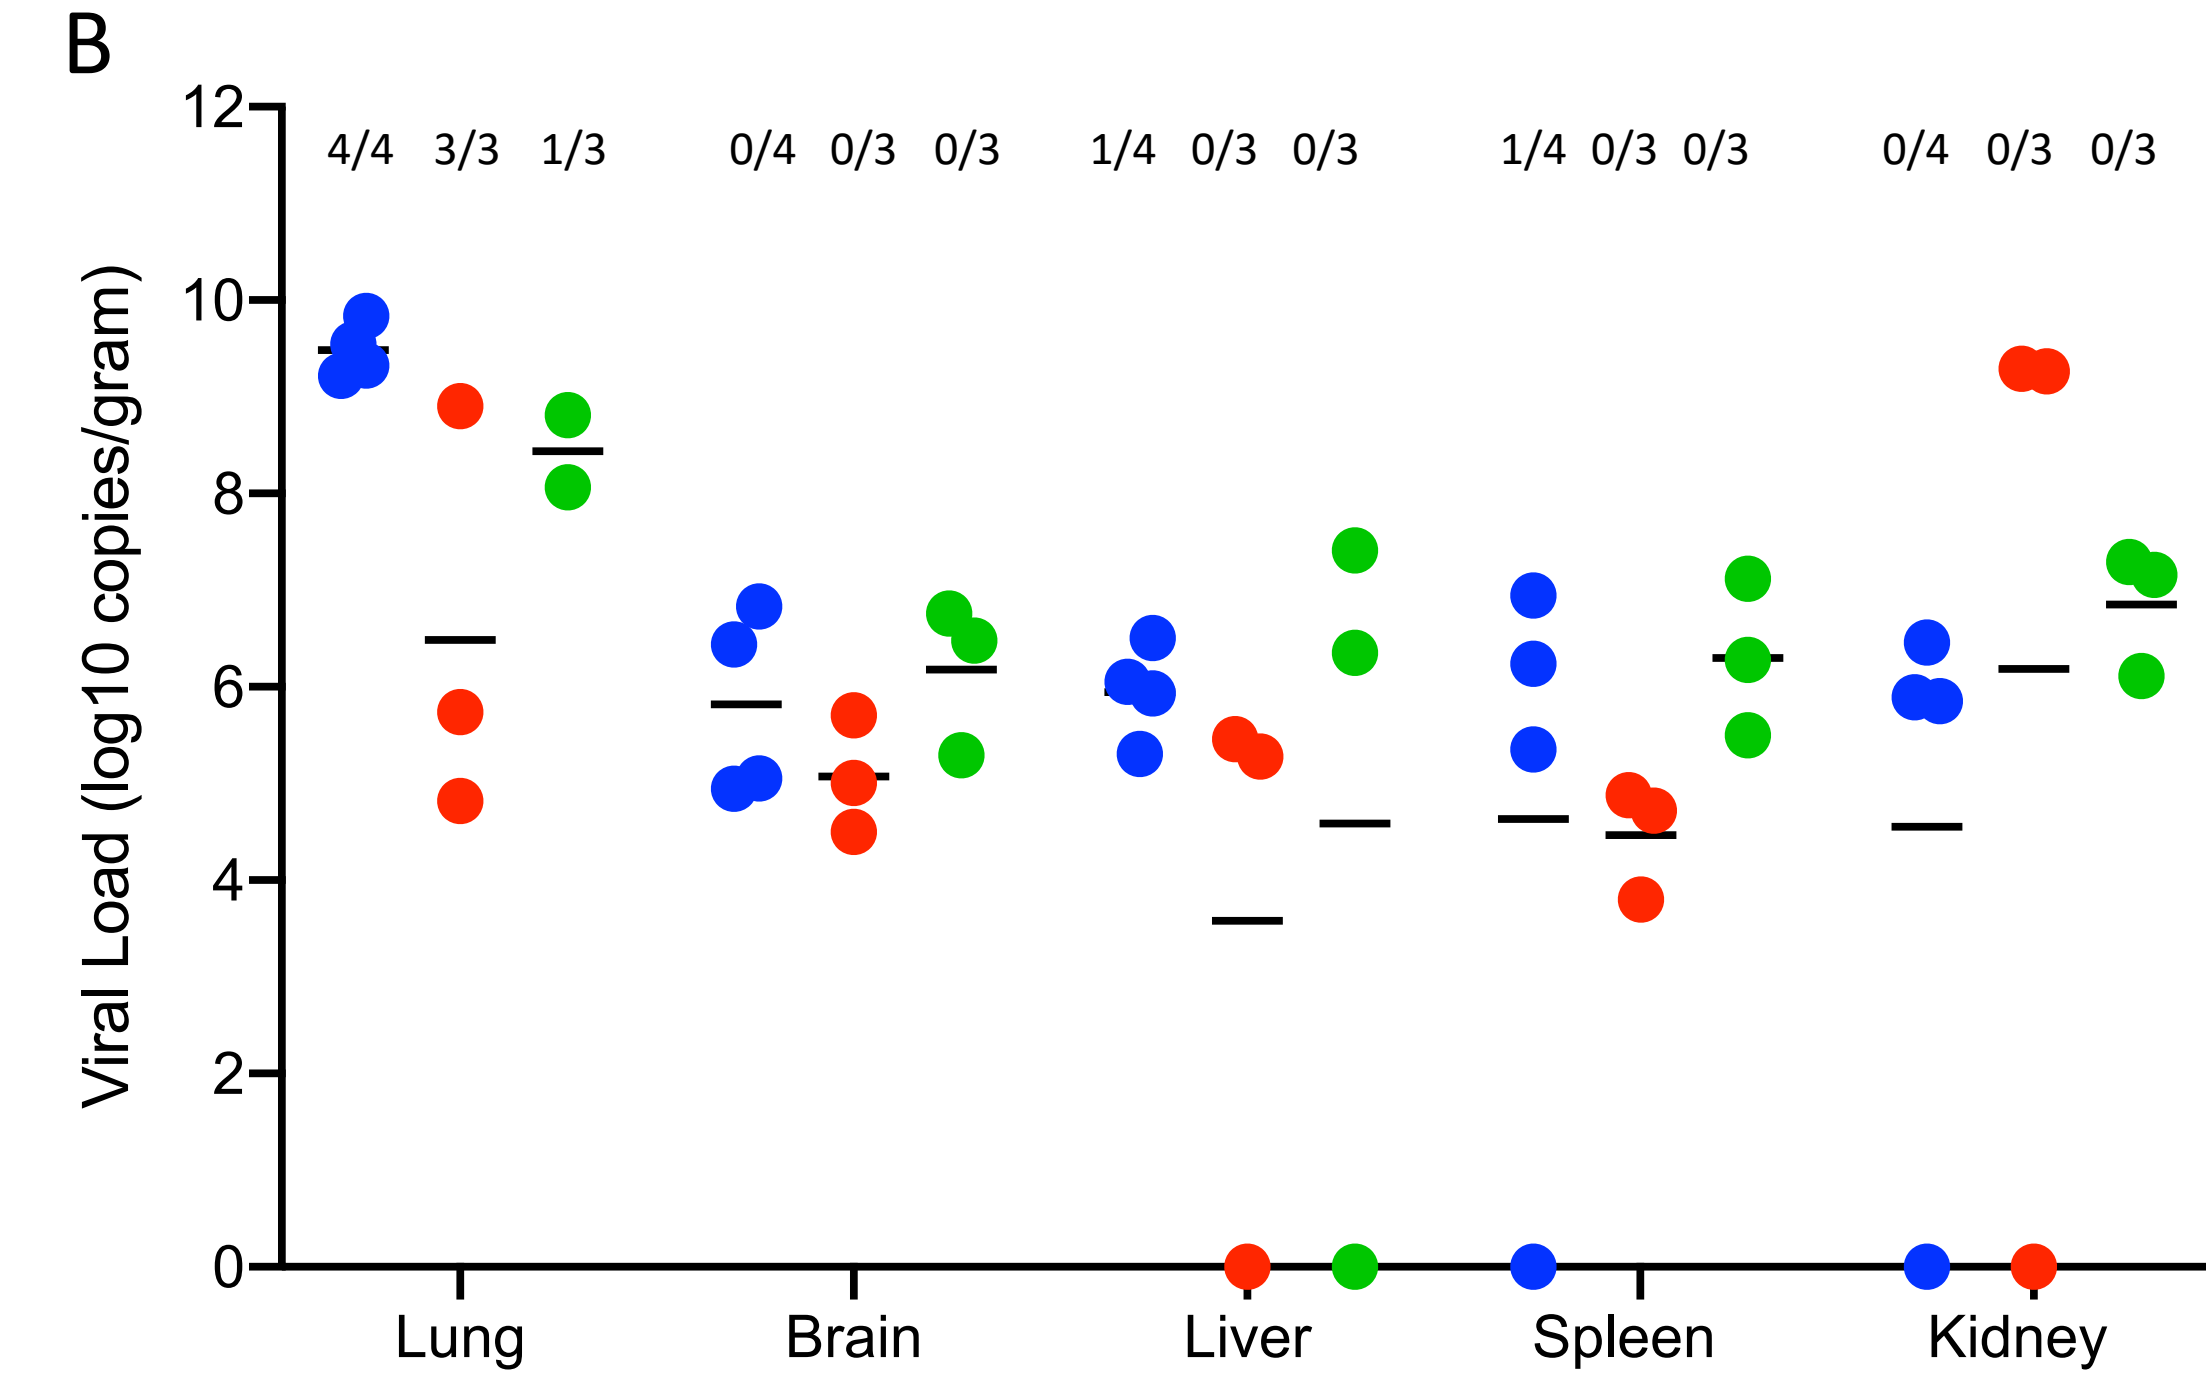

Supplementary Figure 2

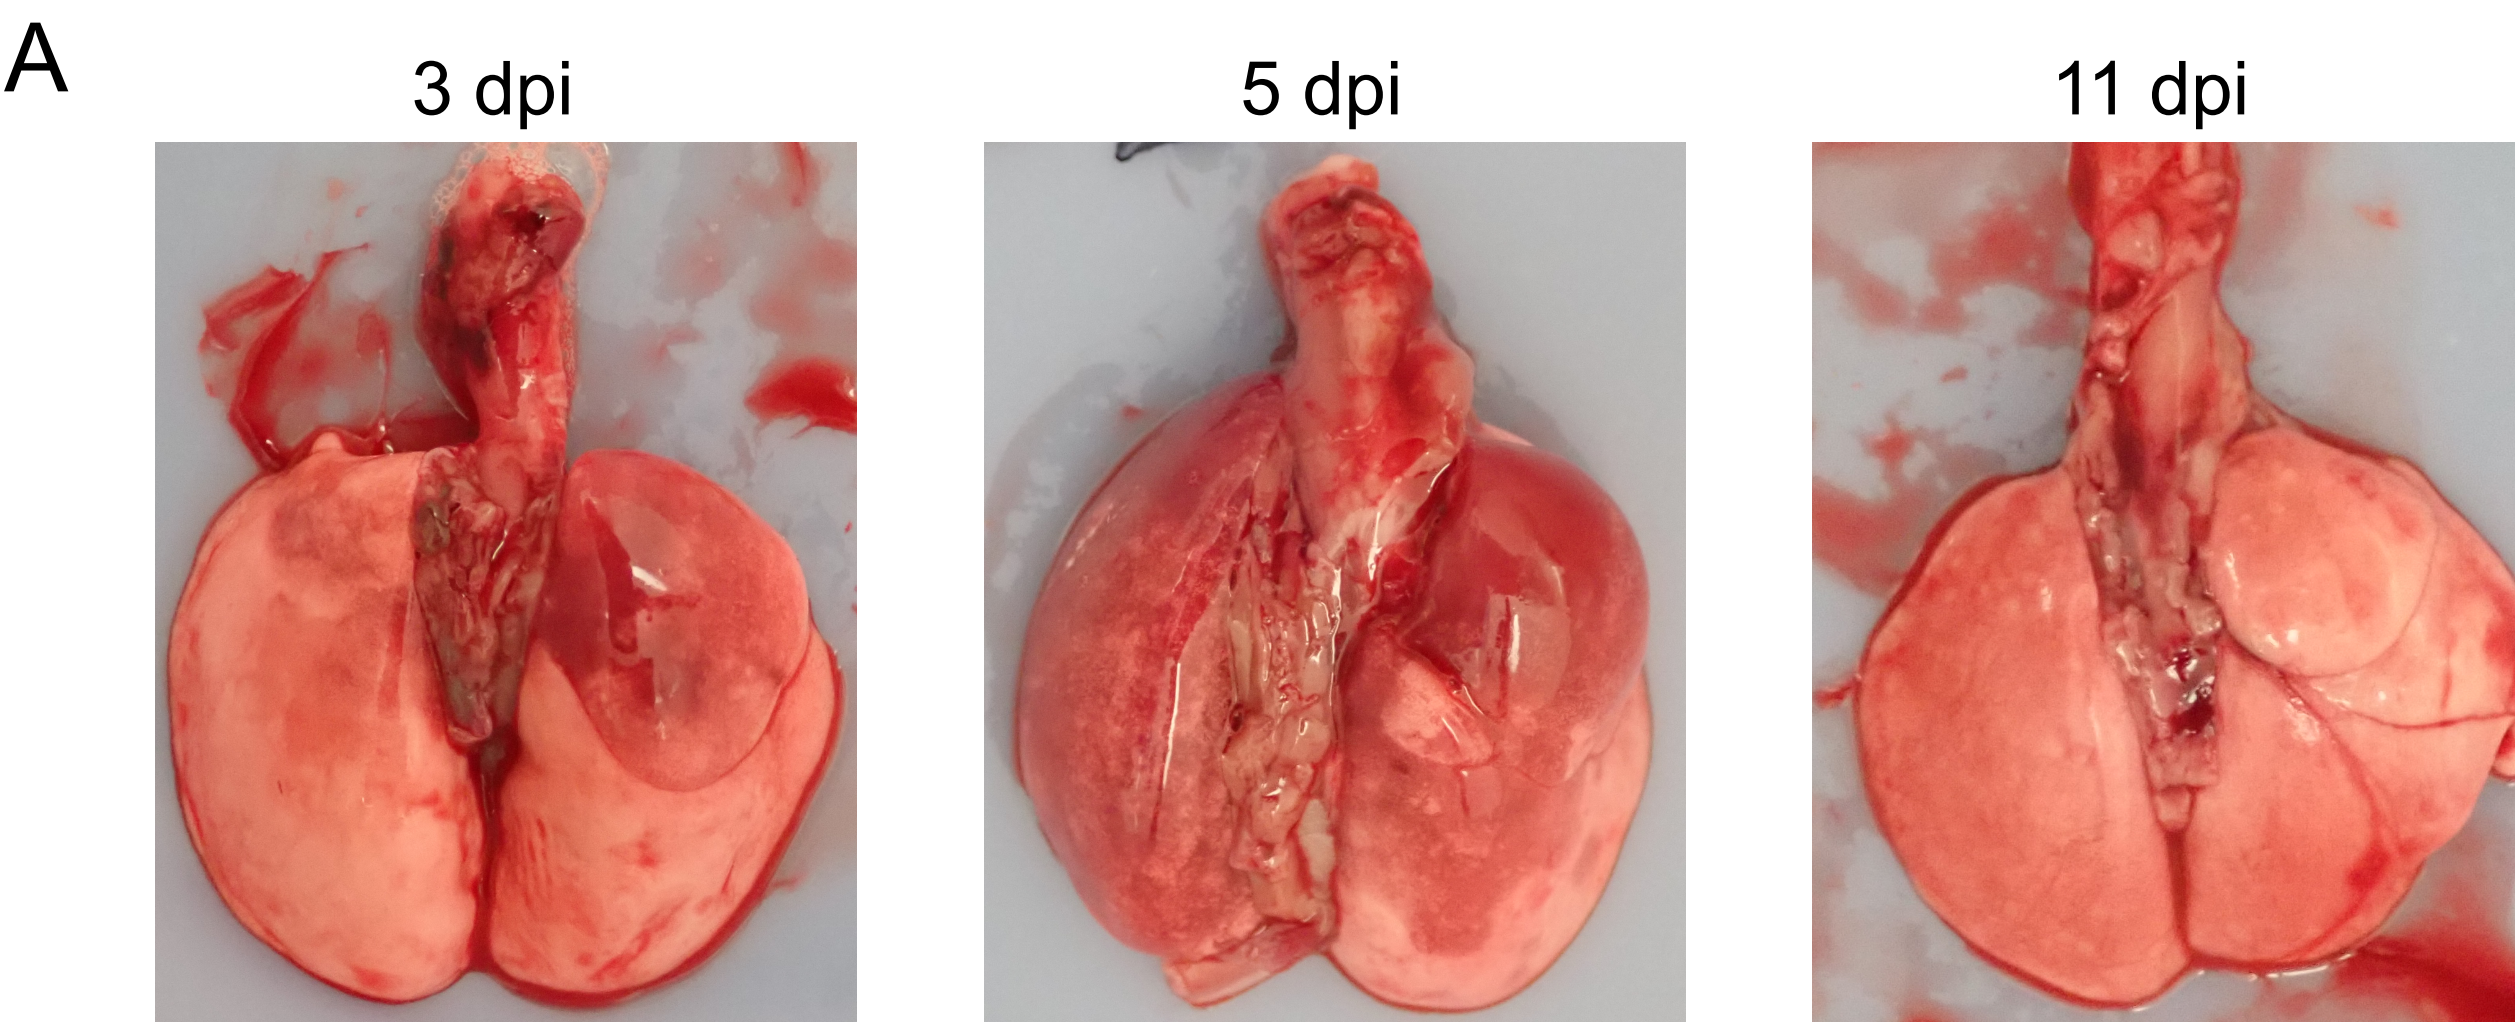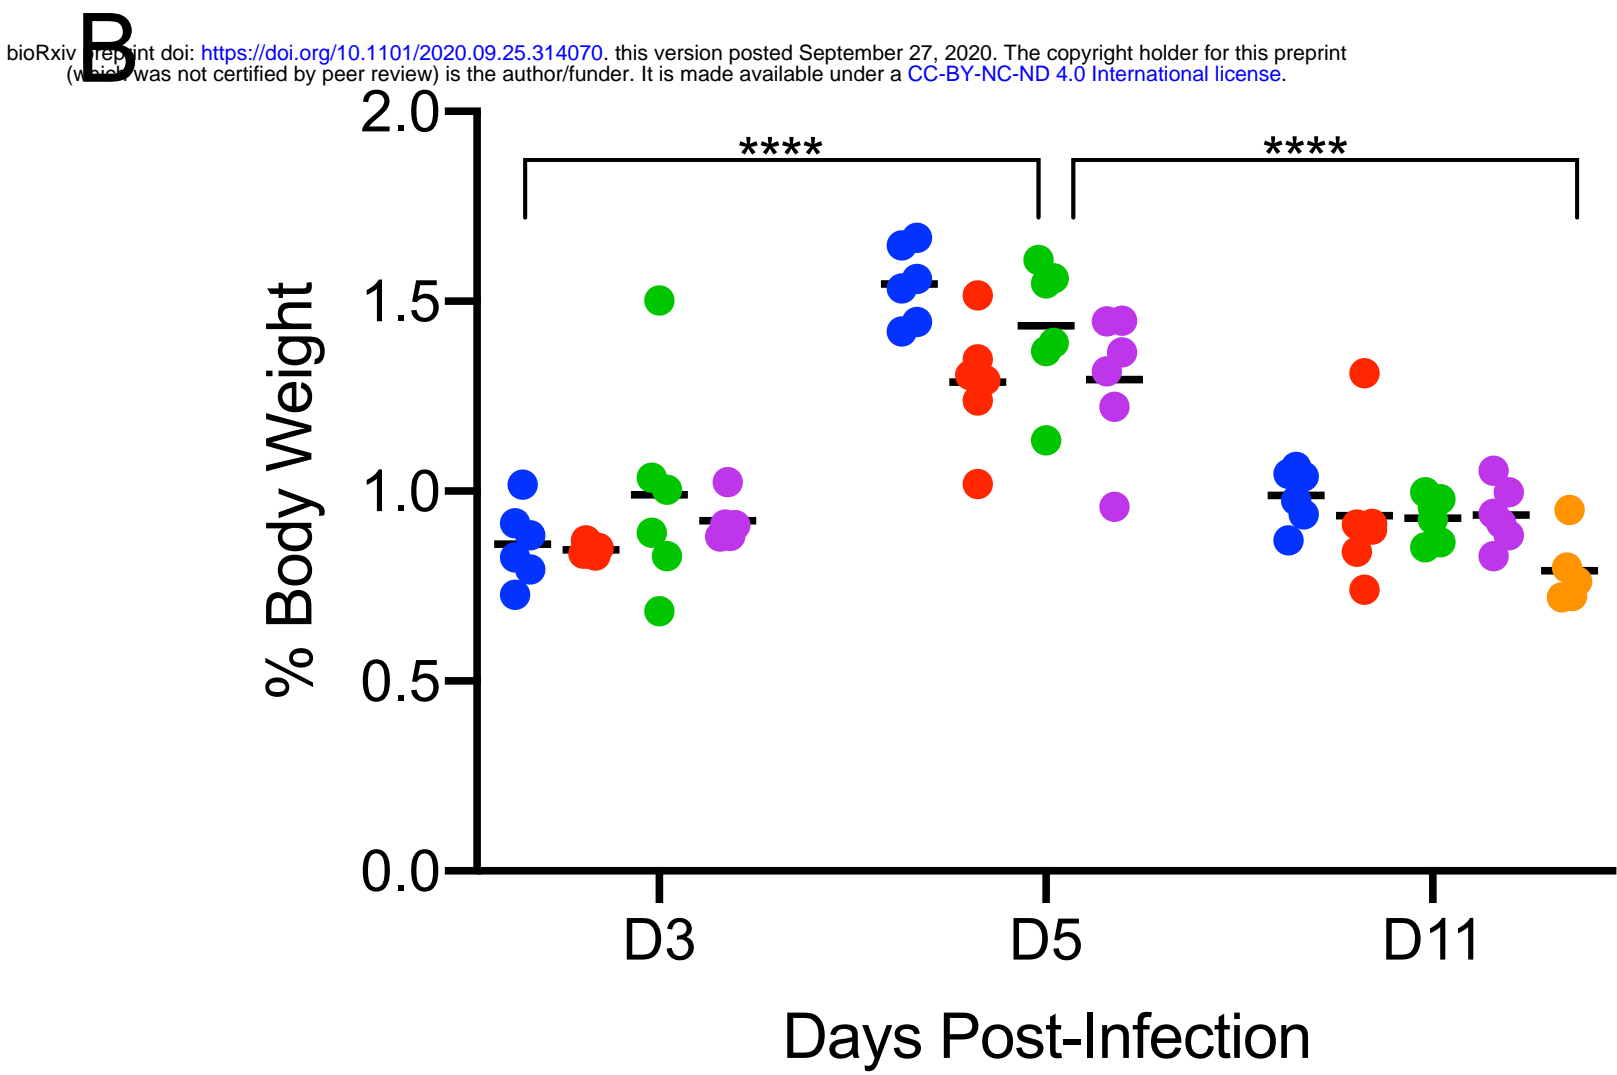

Supplement: NIHPP2020.09.25.314070-supplement-1.pdf [file NIHPP2020.09.25.314070-supplement-1.pdf]
